# Supplementary material
Source: HighWire-hosted journal article supplement (https://erj.ersjournals.com/content/57/5/2002536)
Supplement: inline-supplementary-material-2 [file inline-supplementary-material-2.pdf]

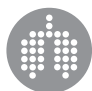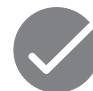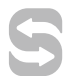

SHAREABLE PDF

# Endothelial eNAMPT amplifies pre-clinical acute lung injury: efficacy of an eNAMPT-neutralising monoclonal antibody

Hector Quijada<sup>1,9</sup>, Tadeo Bermudez<sup>1,9</sup>, Carrie L. Kempf<sup>1</sup>, Daniel G. Valera<sup>1</sup>, Alexander N. Garcia<sup>2</sup>, Sara M. Camp<sup>1</sup>, Jin H. Song<sup>1</sup>, Evelyn Franco<sup>1</sup>, Jessica K. Burt<sup>1</sup>, Belinda Sun<sup>3</sup>, Joseph B. Mascarenhas<sup>1</sup>, Kimberlie Burns<sup>1</sup>, Amir Gaber<sup>1</sup>, Radu C. Oita<sup>1</sup>, Vivian Reyes Hernon<sup>1</sup>, Christy Barber<sup>4</sup>, Liliana Moreno-Vinasco<sup>1</sup>, Xiaoguang Sun<sup>1</sup>, Anne E. Cress<sup>5</sup>, Diego Martin<sup>6</sup>, Zhonglin Liu<sup>4</sup>, Ankit A. Desai<sup>7</sup>, Viswanathan Natarajan<sup>8</sup>, Jeffrey R. Jacobson<sup>8</sup>, Steven M. Dudek<sup>8</sup>, Christian Bime<sup>1</sup>, Saad Sammani<sup>1,10</sup> and Joe G.N. Garcia<sup>1,10</sup>

**Affiliations:** <sup>1</sup>Dept of Medicine, University of Arizona Health Sciences, Tucson, AZ, USA. <sup>2</sup>Dept of Radiation Oncology, University of Arizona Health Sciences, Tucson, AZ, USA. <sup>3</sup>Dept of Pathology, University of Arizona Health Sciences, Tucson, AZ, USA. <sup>4</sup>Dept of Medical Imaging, University of Arizona Health Sciences, Tucson, AZ, USA. <sup>5</sup>Dept of Cellular and Molecular Medicine, University of Arizona Health Sciences, Tucson, AZ, USA. <sup>6</sup>Houston Methodist Hospital Research Institute, Houston, TX, USA. <sup>7</sup>Dept of Medicine, Indiana University, Indianapolis IN, USA. <sup>8</sup>Dept of Medicine, University of Illinois Chicago, Chicago, IL, USA. <sup>9</sup>Co-first authors. <sup>10</sup>Co-senior authors.

**Correspondence:** Joe G.N. Garcia, University of Arizona Health Sciences, 1295 N Martin Ave, Suite A274, Tucson, AZ 85721, USA. E-mail: skipgarcia@email.arizona.edu

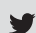

@ERSpublications

**Underscoring the therapeutic potential for targeting the eNAMPT/TLR4 pathway in ARDS/VILI, a humanised eNAMPT-neutralising monoclonal antibody (mAb) was highly effective in reducing the severity of ARDS in these dual complementary pre-clinical ARDS models** <https://bit.ly/3ljEhBD>

**Cite this article as:** Quijada H, Bermudez T, Kempf CL, *et al.* Endothelial eNAMPT amplifies pre-clinical acute lung injury: efficacy of an eNAMPT-neutralising monoclonal antibody. *Eur Respir J* 2021; 57: 2002536 [https://doi.org/10.1183/13993003.02536-2020].

This single-page version can be shared freely online.

## ABSTRACT

**Rationale:** The severe acute respiratory syndrome coronavirus 2/coronavirus disease 2019 pandemic has highlighted the serious unmet need for effective therapies that reduce acute respiratory distress syndrome (ARDS) mortality. We explored whether extracellular nicotinamide phosphoribosyltransferase (eNAMPT), a ligand for Toll-like receptor (TLR)4 and a master regulator of innate immunity and inflammation, is a potential ARDS therapeutic target.

**Methods:** Wild-type C57BL/6J or endothelial cell (EC)-cNAMPT<sup>-/-</sup> knockout mice (targeted EC NAMPT deletion) were exposed to either a lipopolysaccharide (LPS)-induced (“one-hit”) or a combined LPS/ventilator (“two-hit”)-induced acute inflammatory lung injury model. A NAMPT-specific monoclonal antibody (mAb) imaging probe (<sup>99m</sup>Tc-ProNamptor) was used to detect NAMPT expression in lung tissues. Either an eNAMPT-neutralising goat polyclonal antibody (pAb) or a humanised monoclonal antibody (ALT-100 mAb) were used *in vitro* and *in vivo*.

**Results:** Immunohistochemical, biochemical and imaging studies validated time-dependent increases in NAMPT lung tissue expression in both pre-clinical ARDS models. Intravenous delivery of either eNAMPT-neutralising pAb or mAb significantly attenuated inflammatory lung injury (haematoxylin and eosin staining, bronchoalveolar lavage (BAL) protein, BAL polymorphonuclear cells, plasma interleukin-6) in both pre-clinical models. *In vitro* human lung EC studies demonstrated eNAMPT-neutralising antibodies (pAb,

mAb) to strongly abrogate eNAMPT-induced TLR4 pathway activation and EC barrier disruption. *In vivo* studies in wild-type and EC-cNAMPT<sup>-/-</sup> mice confirmed a highly significant contribution of EC-derived NAMPT to the severity of inflammatory lung injury in both pre-clinical ARDS models.

**Conclusions:** These findings highlight both the role of EC-derived eNAMPT and the potential for biologic targeting of the eNAMPT/TLR4 inflammatory pathway. In combination with predictive eNAMPT biomarker and *NAMPT* genotyping assays, this offers the opportunity to identify high-risk ARDS subjects for delivery of personalised medicine.
